# Supplementary material for: A Transient Increase in the Serum ANCAs in Patients with SARS-CoV-2 Infection: A Signal of Subclinical Vasculitis or an Epiphenomenon with No Clinical Manifestations? A Pilot Study
Source: MDPI journal article supplement (doi:10.3390/v13091718), 2021-08-29
Supplement: s1 [file s1]

**Table S1.** Imprecision (CV%) and inaccuracy (%) values of analytical methods evaluated on the highest and lower calibration points.

|              | Imprecision<br>(CV%) | Inaccuracy<br>(%) |
|--------------|----------------------|-------------------|
| ANCA (ng/mL) |                      |                   |
| 20           | 0.07                 | −0.10             |
| 0.62         | 0.29                 | 14.5              |
| MPO (ng/mL)  |                      |                   |
| 29.7         | 3.74                 | 0.28              |
| 0.04         | 11.0                 | −10.7             |
| PR3 (ng/mL)  |                      |                   |
| 10           | 3.6                  | 0.05              |
| 0.16         | 1.1                  | −0.11             |
